# Supplementary material
Source: PubMed Central journal article supplement (PMC3256886)
Supplement: supp_M111.267674_jbc.M111.267674-1.pdf [file supp_M111.267674_jbc.M111.267674-1.pdf]

Table S1 (Malmström et al)

| Protein description                                                  | Acc     | Gene   | u  | pep | seq | cov | TH      | 1%      | 5%      | 10%     | 20%     |
|----------------------------------------------------------------------|---------|--------|----|-----|-----|-----|---------|---------|---------|---------|---------|
| <b>Reduced</b>                                                       |         |        |    |     |     |     |         |         |         |         |         |
| 3-oxoacyl-[acyl-carrier-protein] synthase 2                          | SPy1748 | fabF   | 22 |     | 83% |     | 3.4E+08 | 2.9E+08 | 1.2E+08 | 1.7E+07 | 5.9E+05 |
| 3-oxoacyl-[acyl-carrier-protein] reductase                           | SPy1749 | fabG   | 11 |     | 45% |     | 7.5E+07 | 5.4E+07 | 3.8E+07 | 4.6E+06 | 6.0E+05 |
| Malonyl-CoA-[acyl-carrier-protein] transacylase                      | SPy1750 | fabD   | 17 |     | 57% |     | 6.3E+07 | 6.7E+07 | 4.0E+07 | 0.0E+00 | 1.9E+06 |
| Enoyl-[acyl-carrier-protein] reductase                               | SPy1751 | fabK   | 8  |     | 40% |     | 3.1E+07 | 2.5E+07 | 1.9E+07 | 5.4E+05 | 1.7E+06 |
| GTP-binding protein Era                                              | SPy0476 |        | 3  |     | 19% |     | 5.5E+06 | 1.4E+06 | 1.7E+06 | 1.2E+06 | 3.1E+05 |
| Glycine betaine transport ATP-binding protein                        | SPy0183 | opuAA  | 5  |     | 24% |     | 1.1E+07 | 8.1E+06 | 8.5E+06 | 4.6E+06 | 6.8E+05 |
| Peptide chain release factor 3                                       | SPy1416 | prfC   | 8  |     | 21% |     | 1.2E+07 | 7.2E+06 | 4.6E+06 | 1.5E+06 | 8.8E+05 |
| ABC transporter 2C ATP-binding protein                               | SPy1729 |        | 3  |     | 18% |     | 3.4E+06 | 2.0E+06 | 5.5E+06 | 1.3E+06 | 3.5E+05 |
| Topoisomerase IV subunit A                                           | SPy0910 | parC   | 7  |     | 13% |     | 5.2E+06 | 1.8E+06 | 4.1E+06 | 1.2E+06 | 5.8E+05 |
| GTP cyclohydrolase I (EC 3.5.4.16) type 1                            | SPy1097 | folE   | 4  |     | 27% |     | 6.7E+06 | 4.0E+06 | 2.1E+06 | 2.0E+06 | 8.1E+05 |
| Translation initiation factor 2                                      | SPy1721 | infB   | 16 |     | 27% |     | 3.5E+07 | 2.5E+07 | 1.3E+07 | 1.2E+07 | 4.4E+06 |
| Glutamine ABC transporter 2C glutamine-binding protein               | SPy1315 |        | 24 |     | 39% |     | 9.5E+07 | 9.6E+07 | 7.0E+07 | 4.0E+07 | 1.3E+07 |
| Phosphate transport system regulatory protein PhoU                   | SPy1240 | phoU   | 5  |     | 30% |     | 1.2E+07 | 4.6E+06 | 3.0E+06 | 2.0E+06 | 1.6E+06 |
| N-acetylglucosamine-1-phosphate uridylyltransferase                  | SPy0443 | gcaD   | 8  |     | 18% |     | 1.4E+07 | 3.0E+06 | 5.2E+06 | 7.7E+05 | 1.9E+06 |
| DNA binding protein starved cells-like peroxide resistance protein   | SPy1531 |        | 11 |     | 66% |     | 5.2E+08 | 3.8E+08 | 2.2E+08 | 3.4E+08 | 7.2E+07 |
| Biotin carboxylase of acetyl-CoA carboxylase                         | SPy1745 | accC   | 10 |     | 41% |     | 3.1E+07 | 1.5E+07 | 2.0E+07 | 2.8E+05 | 4.2E+06 |
| Catabolite control protein A                                         | SPy0514 | ccpA   | 8  |     | 38% |     | 7.4E+06 | 4.3E+06 | 5.1E+06 | 2.5E+06 | 1.0E+06 |
| Glutamine transport ATP-binding protein glnQ                         | SPy1316 |        | 10 |     | 52% |     | 6.3E+07 | 5.3E+07 | 5.2E+07 | 2.7E+07 | 9.3E+06 |
| hypothetical protein                                                 | SPy1264 |        | 3  |     | 15% |     | 6.8E+06 | 7.2E+06 | 7.3E+06 | 5.3E+06 | 1.0E+06 |
| S-adenosylmethionine synthetase                                      | SPy1359 | metK   | 5  |     | 21% |     | 1.4E+07 | 1.0E+07 | 6.7E+06 | 6.7E+06 | 2.2E+06 |
| <b>Increased</b>                                                     |         |        |    |     |     |     |         |         |         |         |         |
| ATP-dependent RNA helicase 2C DEAD 2FDEAH box family                 | SPy1369 | deaD2  | 1  |     | 7%  |     | 3.6E+05 | 2.0E+06 | 2.5E+06 | 1.6E+06 | 2.9E+06 |
| Dihydroorotate dehydrogenase 2C catalytic subunit                    | SPy1432 | pyrD   | 24 |     | 76% |     | 7.9E+07 | 3.8E+07 | 2.1E+08 | 2.7E+08 | 5.5E+08 |
| Ribonuclease R                                                       | SPy0503 |        | 11 |     | 21% |     | 2.1E+06 | 1.7E+06 | 1.8E+06 | 6.7E+06 | 1.1E+07 |
| Orotidine 5'-phosphate decarboxylase                                 | SPy0900 | pyrF   | 17 |     | 77% |     | 1.5E+07 | 3.8E+06 | 1.5E+07 | 5.0E+07 | 6.8E+07 |
| Deoxyguanosinetriphosphate triphosphohydrolase                       | SPy0621 |        | 2  |     | 9%  |     | 3.1E+05 | 5.1E+05 | 7.9E+05 | 8.4E+05 | 1.4E+06 |
| Peptidoglycan N-acetylglucosamine deacetylase (EC 3.5.1.-)           | SPy1370 |        | 6  |     | 24% |     | 1.9E+06 | 1.3E+06 | 2.6E+06 | 4.1E+06 | 8.2E+06 |
| hypothetical protein                                                 | SPy1304 |        | 3  |     | 44% |     | 3.2E+05 | 2.5E+05 | 1.0E+06 | 1.1E+06 | 1.2E+06 |
| Putative cell-cycle regulation histidine triad (HIT) protein         | SPy1730 |        | 5  |     | 79% |     | 3.1E+06 | 4.0E+06 | 8.8E+06 | 9.9E+06 | 1.1E+07 |
| Orotate phosphoribosyltransferase                                    | SPy0901 | pyrE   | 10 |     | 70% |     | 1.7E+07 | 3.9E+06 | 2.8E+07 | 5.6E+07 | 5.9E+07 |
| Heat shock protein GrpE                                              | SPy1761 | grpE   | 6  |     | 48% |     | 1.5E+07 | 3.4E+06 | 9.4E+06 | 2.6E+07 | 5.0E+07 |
| hypothetical protein                                                 | SPy1508 |        | 1  |     | 22% |     | 1.4E+06 | 3.6E+06 | 4.0E+06 | 3.2E+06 | 4.4E+06 |
| Heat shock protein 60 family co-chaperone GroES                      | SPy2072 | groES  | 8  |     | 96% |     | 9.1E+07 | 8.7E+07 | 8.1E+07 | 1.8E+08 | 2.4E+08 |
| SSU ribosomal protein S10p (S20e)                                    | SPy0047 | rpsJ   | 7  |     | 53% |     | 1.9E+08 | 4.2E+08 | 1.6E+08 | 3.5E+08 | 4.6E+08 |
| C3-degrading proteinase                                              | SPy1851 |        | 9  |     | 39% |     | 1.1E+07 | 6.8E+06 | 1.6E+07 | 3.2E+07 | 2.7E+07 |
| LSU ribosomal protein L15p (L27Ae)                                   | SPy0072 | rplO   | 7  |     | 48% |     | 1.6E+08 | 4.5E+08 | 3.7E+08 | 5.0E+08 | 3.8E+08 |
| Neutral endopeptidase O                                              | SPy2095 | pepO   | 29 |     | 49% |     | 1.4E+08 | 2.0E+08 | 2.4E+08 | 3.0E+08 | 3.0E+08 |
| Xanthine phosphoribosyltransferase                                   | SPy1136 |        | 3  |     | 23% |     | 9.1E+05 | 0.0E+00 | 1.6E+06 | 2.4E+06 | 1.9E+06 |
| SSU ribosomal protein S18p                                           | SPy1829 | rpsR   | 7  |     | 30% |     | 4.8E+07 | 7.6E+07 | 8.5E+07 | 1.1E+08 | 9.2E+07 |
| Ribosylhomocysteine (EC 3.2.1.148)                                   | SPy1642 | luxS   | 3  |     | 36% |     | 4.4E+06 | 5.8E+06 | 4.8E+06 | 7.0E+06 | 8.4E+06 |
| Transcriptional regulator 2C repressor of the glutamine synthetase   | SPy1878 |        | 6  |     | 67% |     | 7.6E+06 | 4.2E+06 | 4.0E+06 | 7.4E+06 | 1.4E+07 |
| <b>No detectable levels in 20%</b>                                   |         |        |    |     |     |     |         |         |         |         |         |
| D-alanine--poly(phosphoribitol) ligase subunit 2                     | SPy1310 | ditC   | 1  |     | 14% |     | 2.6E+06 | 1.8E+06 | 3.5E+05 | 0.0E+00 | 0.0E+00 |
| Spermidine Putrescine transport ATP-binding protein                  | SPy1102 | potA   | 1  |     | 4%  |     | 1.4E+06 | 1.2E+06 | 8.5E+05 | 0.0E+00 | 0.0E+00 |
| (3R)-hydroxymyristoyl-[acyl-carrier-protein] dehydratase             | SPy1746 | fabZ   | 4  |     | 28% |     | 6.4E+06 | 3.5E+06 | 1.0E+06 | 0.0E+00 | 0.0E+00 |
| ABC transporter ATP-binding protein                                  | SPy1674 |        | 1  |     | 5%  |     | 1.4E+06 | 1.5E+06 | 1.3E+06 | 9.2E+05 | 0.0E+00 |
| L-proline Glycine Betaine ABC transport system permease protein proW | SPy0184 | opuABC | 4  |     | 10% |     | 6.0E+06 | 7.2E+06 | 4.3E+06 | 9.6E+05 | 0.0E+00 |
| UDP-N-acetylmuramoylalanine--D-glutamate ligase                      | SPy1525 | murD   | 3  |     | 16% |     | 3.8E+06 | 2.0E+06 | 2.9E+06 | 1.1E+06 | 0.0E+00 |
| Integral membrane protein                                            | SPy1828 |        | 2  |     | 17% |     | 3.6E+06 | 3.1E+06 | 3.2E+06 | 2.1E+06 | 0.0E+00 |
| Hydrolase (HAD superfamily)                                          | SPy1633 |        | 8  |     | 24% |     | 3.7E+06 | 1.8E+06 | 2.1E+06 | 5.3E+05 | 0.0E+00 |
| PTS system 2C mannose 2Fructose family IIB component                 | SPy1058 |        | 4  |     | 47% |     | 6.0E+06 | 7.5E+06 | 2.4E+06 | 6.5E+05 | 0.0E+00 |
| 3-oxoacyl-[acyl-carrier-protein] synthase 3                          | SPy1754 | fabH   | 3  |     | 22% |     | 5.3E+06 | 4.8E+06 | 2.7E+06 | 1.1E+06 | 0.0E+00 |
| <b>No detectable levels in TH</b>                                    |         |        |    |     |     |     |         |         |         |         |         |
| Hyaluronan synthase                                                  | SPy2200 | hasA   | 3  |     | 10% |     | 0.0E+00 | 0.0E+00 | 0.0E+00 | 2.9E+06 | 5.8E+06 |
| hypothetical protein                                                 | SPy2060 |        | 2  |     | 27% |     | 0.0E+00 | 0.0E+00 | 7.0E+05 | 9.9E+05 | 3.7E+06 |
| Streptokinase                                                        | SPy1979 | ska    | 1  |     | 5%  |     | 0.0E+00 | 0.0E+00 | 0.0E+00 | 0.0E+00 | 3.0E+06 |
| SSE esterase (nmpd )                                                 | SPy1718 | sse    | 3  |     | 21% |     | 0.0E+00 | 0.0E+00 | 0.0E+00 | 5.9E+05 | 2.5E+06 |
| Peptide methionine sulfoxide reductase                               | SPy0466 | msrA.2 | 1  |     | 16% |     | 0.0E+00 | 0.0E+00 | 0.0E+00 | 0.0E+00 | 1.1E+06 |
| L-asparaginase                                                       | SPy1782 | asnB   | 1  |     | 7%  |     | 0.0E+00 | 0.0E+00 | 0.0E+00 | 8.1E+05 | 7.7E+05 |
| hypothetical protein                                                 | SPy1875 |        | 1  |     | 21% |     | 0.0E+00 | 0.0E+00 | 0.0E+00 | 0.0E+00 | 6.7E+05 |
| hypothetical protein                                                 | SPy0864 |        | 2  |     | 37% |     | 0.0E+00 | 0.0E+00 | 0.0E+00 | 0.0E+00 | 4.7E+05 |
| Phosphate starvation-inducible protein PhoH 2C predicted ATPase      | SPy0471 | phoH   | 2  |     | 9%  |     | 0.0E+00 | 0.0E+00 | 0.0E+00 | 3.6E+05 | 3.7E+05 |
| Putative regulator of the mannose operon 2C ManO                     | SPy1741 |        | 2  |     | 20% |     | 0.0E+00 | 0.0E+00 | 0.0E+00 | 3.2E+05 | 2.3E+05 |

n\_u\_pep, number of unique peptides; seq\_cov, sequence coverage
